# Supplementary material for: Exploration on the Enhancement of Detoxification Ability of Zearalenone and Its Degradation Products of Aspergillus niger FS10 under Directional Stress of Zearalenone
Source: Toxins (Basel). 2021 Oct 12;13(10):720. doi: 10.3390/toxins13100720 (PMC8537726; doi:10.3390/toxins13100720)
Supplement: Supplementary file 1 [file toxins-13-00720-s001.zip › toxins-1345399-Supple.pdf]

# Supplementary Materials: Exploration on the Enhancement of Detoxification Ability of Zearalenone and its Degradation Products of *Aspergillus niger* FS10 under Directional Stress of Zearalenone

Jian Ji, Jian Yu, Yang Yang, Xiao Yuan, Jia Yang, Yinzhi Zhang, Jiadi Sun and Xiulan Sun

**Table S1.** The sequencing results were compared and analyzed on the NCBI website (<https://blast.ncbi.nlm.nih.gov/Blast.cgi>) to identify the species of the samples submitted for inspection. Generally, the species with the homology of more than 97% and the highest homology obtained by the comparison on the NCBI is judged as the species of the submitted sample.

| Detection method                                                                                                                                                                                                                                                                                                                                                                                                                                                                                                                                       | Homology     | Reference Species        |
|--------------------------------------------------------------------------------------------------------------------------------------------------------------------------------------------------------------------------------------------------------------------------------------------------------------------------------------------------------------------------------------------------------------------------------------------------------------------------------------------------------------------------------------------------------|--------------|--------------------------|
| CSQ                                                                                                                                                                                                                                                                                                                                                                                                                                                                                                                                                    | 696/703(99%) | <i>Aspergillus niger</i> |
| TGCCCCCGGAATACCAGGGGGCGCAATGTGCGTTCAAAGACTCGATGATTCATGAATTCTGCAATTCACA<br>TTAGTTATCGCATTTTCGCTGCGTTCTTCATCGATGCCGGAACCAAGAGATCCATTGTTGAAAGTTTTAACTGAT<br>TGCATTCAATCAACTCAGACTGCACGCTTTCAGACAGTGTTTCGTGTTGGGGTCTCCGGCGGGGCACGGGCCCCGG<br>GGGGCAGAGGCGCCCCCGGCGGCCGACAAGCGGCGGGCCCCGCCGAAGCAACAGGGTACAATAGACACG<br>GATGGGAGGTTGGGCCCAAAGGACCCGCACTCGGTAATGATCCTTCCGTTAGGGGAACCTGCGGAAGGATCA<br>TTACCGAGTGCGGGTCTTTGGGCCCAACCTCCCATCCGTGTCTATTGTACCTGTTGCTTCGGCGGGCCCCGC<br>CGCTTGTCGGCCGCCGGGGGGGCGCCTCTGCCCCCGGGCCCGTGCCCGCCGGAGACCCCAACACGAACACT<br>G |              |                          |

**Table S2.** Specific values of degradation rate of each generation.

| Generation      | Degradation Rate(%) (Mean $\pm$ SD) |
|-----------------|-------------------------------------|
| Raw (FS-10)     | 83.51 $\pm$ 1.78                    |
| G1              | 80.25 $\pm$ 1.68                    |
| G2              | 70.36 $\pm$ 5.06                    |
| G3              | 80.56 $\pm$ 5.56                    |
| G4              | 92.22 $\pm$ 0.88                    |
| G5 (ZEN-S-FS10) | 95.58 $\pm$ 0.39                    |

**Table S3.** Fitting results of first order degradation kinetics.

| Concentration (ng/mL) | $k_1$ (h <sup>-1</sup> ) |
|-----------------------|--------------------------|
| 493.54                | 0.0033                   |
| 481.49                | 0.0047                   |
| 445.34                | 0.0096                   |
| 361.01                | 0.0204                   |
| 264.62                | 0.0318                   |
| 107.99                | 0.0639                   |

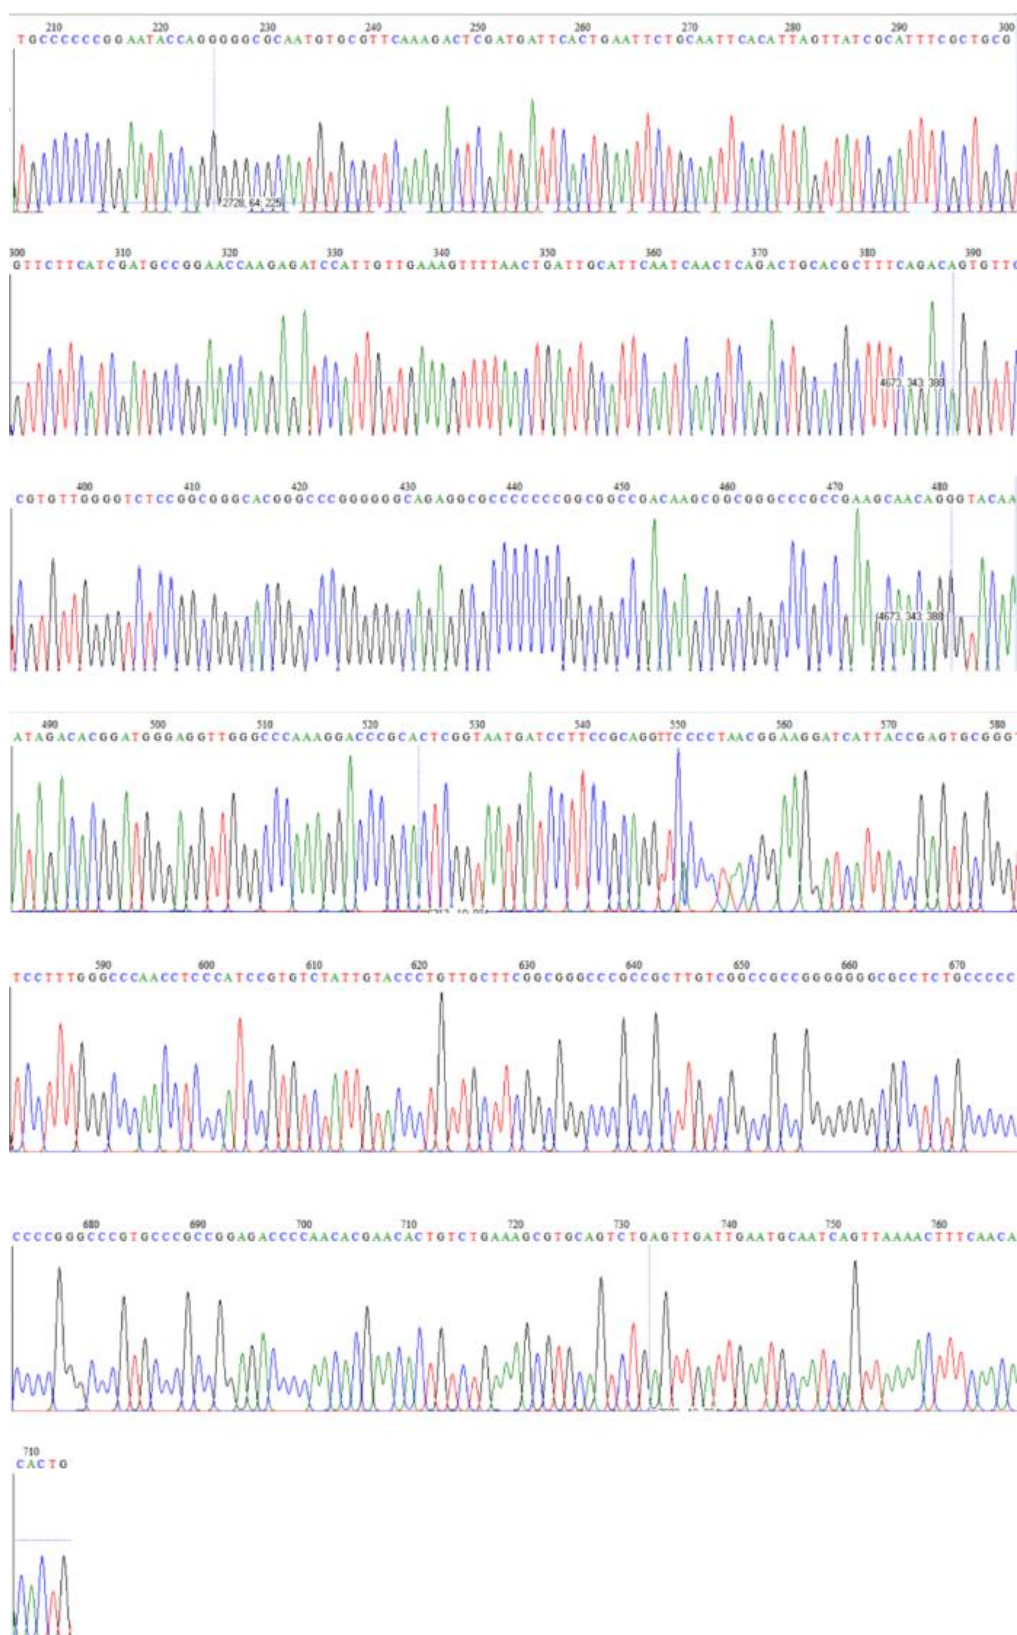

**Figure S1.** The content intensity of all base sequences of ZEN-S-FS10.

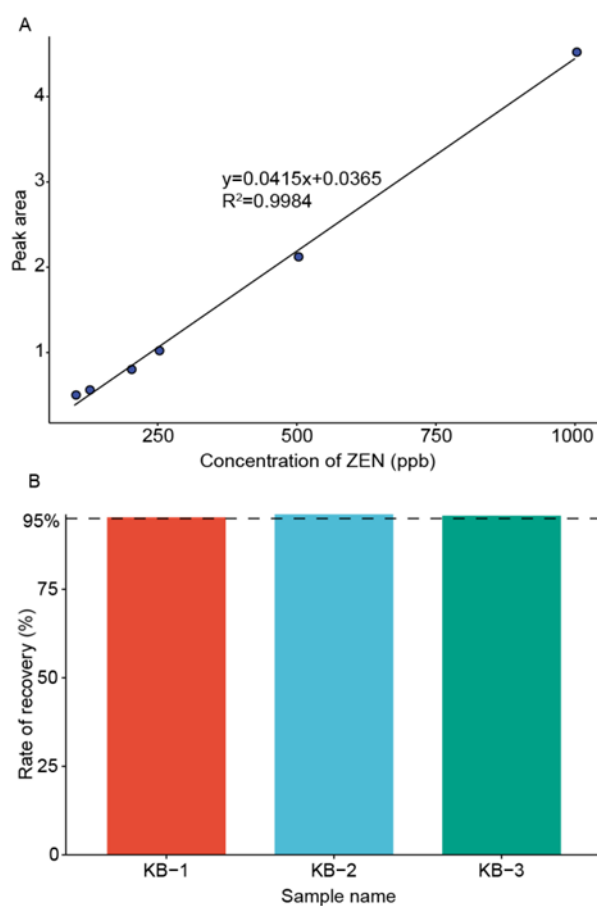

**Figure S2.** Recovery of ZEN in the blank control group of ZEN-S-FS10; (A) ZEN concentration and ration standard curve; (B) validation of recovery rate of blank control group.

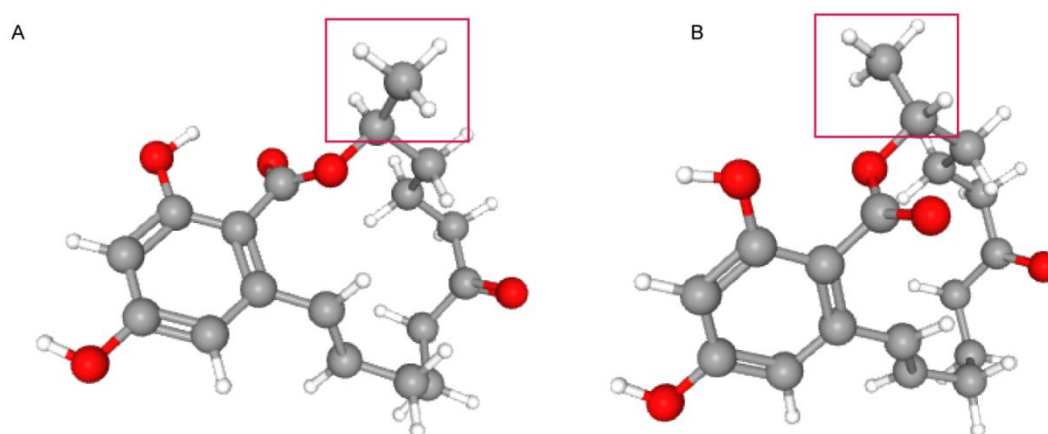

**Figure S3.** Comparison of the space structure of ZEN molecule and product B; (A) ZEN molecular space structure; (B) product B molecular space structure.
